# Supplementary material for: Improving the cycling stability and rate performance of an aqueous sodium-ion supercapattery via mitigating metal dissolution and boosting conductivity by anchoring FePBA on rGO
Source: Royal Society of Chemistry journal article supplement (doi:10.1039/d4ta08419e), 2024-12-12
Supplement: d4ta08419e1.pdf [file d4ta08419e1.pdf]

*Supporting Information*

**Improving Cycling Stability and Rate Performance of Aqueous Sodium-Ion Supercapattery via Mitigating Metal Dissolution and Boosting Conductivity by Anchoring FePBA on rGO**

*Sheetal Gupta<sup>a</sup>, Mayank K. Singh<sup>a</sup>, Sarathkumar Krishnan<sup>a</sup>, Suporna Bhowmik<sup>a</sup>, Khushwant Singh<sup>a</sup>, and Dharendra K. Rai<sup>a\*</sup>*

<sup>a</sup>Sustainable Energy & Environmental Materials (SEEM) Lab, Department of Metallurgical Engineering and Materials Science (MEMS), Indian Institute of Technology Indore, Simrol, Khandwa Road, Indore 453552, India.

\*Corresponding author: *Tel: +91 731 660 3278*

*E-mail: dkrai@iiti.ac.in (D K Rai)*

## List of Content

**S1.** Synthesis of GO and rGO.

**Table S1.** Rietveld refined parameters for  $\text{Na}_{2-x}\text{FeFe}(\text{CN})_6$  sample.

**Fig. S1.** TGA profile of FPBA, rGO, and FPBA/rGO composite.

**Table S2.** Comparison of FPBA, rGO, and FPBA/rGO composite weight loss percentage.

**Fig. S2.**  $\text{N}_2$  adsorption-desorption isotherm of (a) FPBA (b) rGO and, (c) FPBA/rGO composite.

**Fig. S3.** FTIR spectra of FPBA, rGO, and FPBA/rGO composite.

**Fig. S4.** EDX spectra and mapping of Na, Fe, C, N, and O elements in FPBA and FPBA/rGO composite.

**Fig. S5. (a-d)** CV and GCD profiles of FPBA/rGO composites with different ratios of FPBA and rGO at varying scan rates and current densities.

**Fig. S6.** CV profile comparison of bare Ni-form, rGO, FPBA, and FPBA/rGO composite at  $100 \text{ mV}\cdot\text{s}^{-1}$  scan rate.

**Fig. S7.** Charge storage kinetics  $\log(\text{highest current, A})$  vs.  $\log(\text{scan rate, mV}\cdot\text{s}^{-1})$  graph plots of (a) rGO, (b) FPBA, and (c) FPBA/rGO composite.

**Fig. S8.** Electrochemical kinetics analysis: Peak current (highest current, A) vs. square root of scan rate  $(\text{mV}\cdot\text{s}^{-1})^{1/2}$  graph plots of (a) FPBA, and (b) FPBA/rGO composite at different scan rate between 10 to  $100 \text{ mV}\cdot\text{s}^{-1}$ . It is observed that the peak currents for both electrodes exhibit a linear relationship with the square root of the scan rate.

**Fig. S9.** GCD profile comparison of (a) FPBA and (b) rGO at various current densities ranging from  $1\text{-}50 \text{ A g}^{-1}$ .

**Fig. S10. (a-b)** Nyquist plot and equivalent Randles circuit, Bode phase angle plots of rGO.

**Table S3.** Calculated resistance and diffusion coefficient from EIS spectra of FPBA and FPBA/rGO composite.

**Fig. S11.** Bode phase angle plots for rGO, FPBA, and FPBA/rGO composite.

**Fig. S12.** Cyclic stability of FPBA and FPBA/rGO composite at 10 A g<sup>-1</sup> for 10000 cycles.

**Fig. S13.** PXRD data of FPBA/rGO fresh and after 1000 cycles.

**Fig. S14.** (a-b) FESEM and EDX spectra of (a) FPBA electrode fresh and (b) FPBA electrode after 1000 cycles, (c) Iron atomic ratio % comparison between fresh and after 1000 cycles FPBA electrode, (d-e) FESEM and EDX spectra of (a) FPBA/rGO composite electrode fresh and (b) FPBA/rGO composite electrode after 1000 cycles, (f) Iron atomic ratio % comparison between fresh and after 1000 cycles FPBA/rGO composite.

**Table S4.** The concentration of [Fe(CN)<sub>6</sub>]<sup>4-</sup> and [Fe(CN)<sub>6</sub>]<sup>3-</sup> before and after 1000 cycles was calculated according to the UV-Vis spectra.

**Fig. S15.** (a) CV profile of the SSd at scan rates from 10 mV s<sup>-1</sup> to 100 mV s<sup>-1</sup>; (b) GCD profiles of the SSd at current densities from 1 A g<sup>-1</sup> to 10 A g<sup>-1</sup> (c) Specific capacity of SSd Vs. current densities (1-10 A g<sup>-1</sup>) plot for FPBA SSd.

**Fig. S16.** Kinetics calculation based on the frequency ( $\omega^{-1/2}$ ) and Z' values of fresh and after 10000 cycles of the FPBA/rGO composite SSd.

**Table S5.** Calculated resistance and diffusion coefficient from EIS spectra of fresh and after 10000 cycles of the FPBA/rGO composite SSd.

**Table S6.** Comparison table of FPBA/rGO composite SSd.

## S1. Synthesis of GO and rGO

To synthesize graphene oxide (GO), 4 gm of graphite flakes and 2 g of NaNO<sub>3</sub> were added to 140 mL of H<sub>2</sub>SO<sub>4</sub> in a 500 mL flask while stirring in an ice bath. Afterward, 12 g of KMnO<sub>4</sub> was gradually added, keeping the temperature at 20°C. Subsequently, the ice bath was removed, and the reaction mixture was heated to 50°C and stirred for 18 h. Then it was cooled to room temperature, and 220 mL of deionized water and 10 mL of H<sub>2</sub>O<sub>2</sub> were added and further stirred for 4 h. Finally, the reaction mixture was filtered, and the product was washed with 10% HCl, DI water, and ethanol, and then dried in a vacuum oven to obtain GO. To obtain rGO, 500 mg of GO was dispersed in 80 mL of water through sonication and then stirred for 1 h. Afterward, 7 mL of hydrazine hydrate was added at 20°C, and then the reaction mixture was heated to 100°C for 25 h. Finally, the reaction mixture was washed with DI water and ethanol and dried in a vacuum oven to get the dry powder of rGO.

**Table S1.** Rietveld refined parameters for Na<sub>2-x</sub>FeFe (CN)<sub>6</sub> sample.

| Cubic (Fm-3m); a=b=c=10.33(Å); α=β=γ= 90°; V=1102.30 Å <sup>3</sup> ; R <sub>wp</sub> =3.99%, Chi <sup>2</sup> =3.2 |         |         |         |         |           |
|---------------------------------------------------------------------------------------------------------------------|---------|---------|---------|---------|-----------|
| Atoms                                                                                                               | Wyckoff | x       | y       | z       | Occupancy |
| Na                                                                                                                  | 8c      | 0.25000 | 0.25000 | 0.25000 | 0.750     |
| Fe1                                                                                                                 | 4a      | 0.00000 | 0.00000 | 0.00000 | 1.000     |
| Fe2                                                                                                                 | 4b      | 0.50000 | 0.50000 | 0.50000 | 1.000     |
| C                                                                                                                   | 24e     | 0.25000 | 0.00000 | 0.00000 | 1.000     |
| N                                                                                                                   | 24e     | 0.50000 | 0.00000 | 0.00000 | 1.000     |

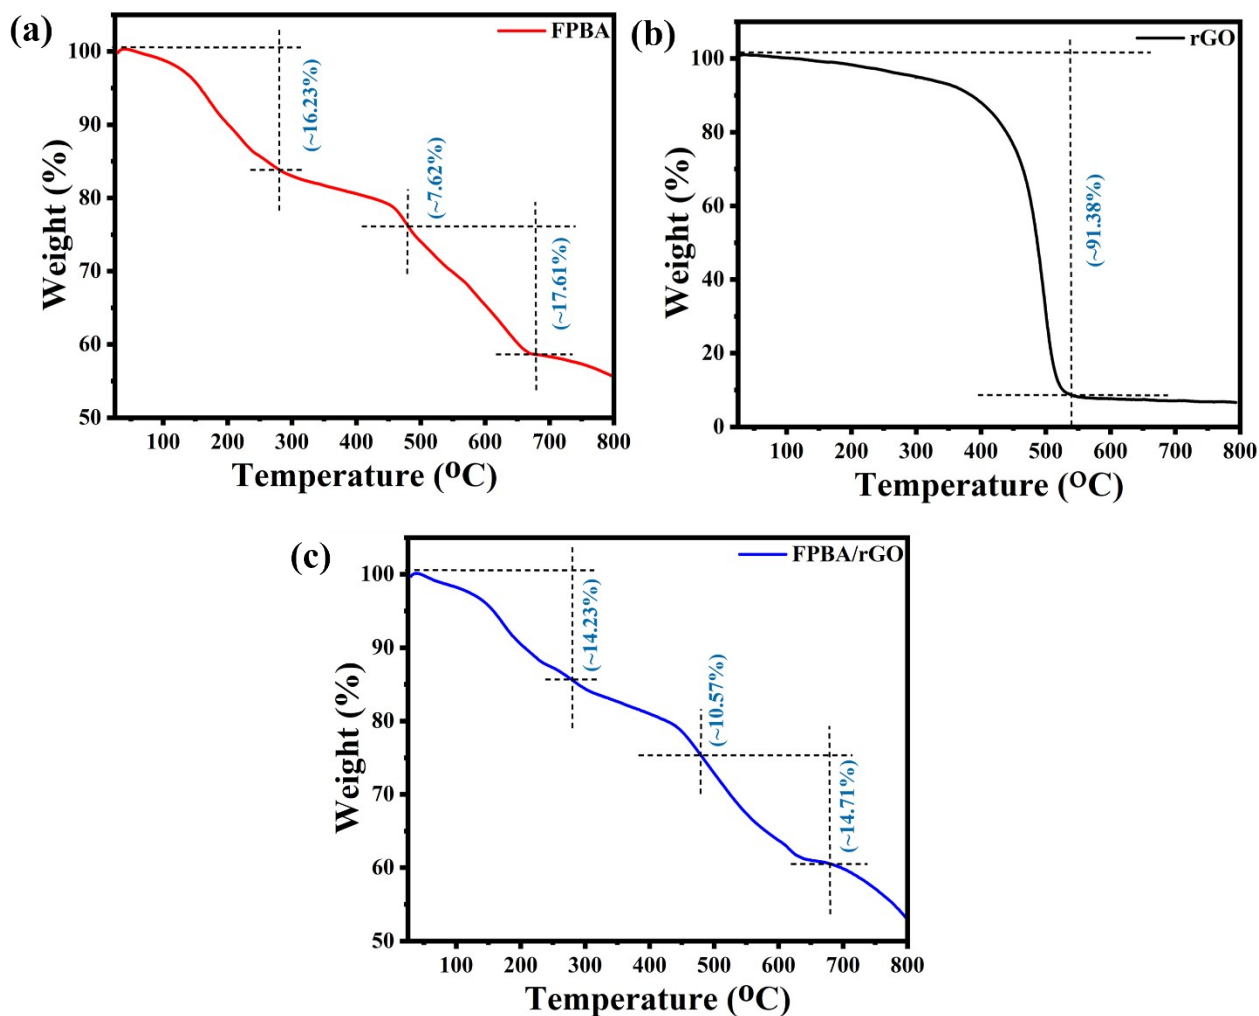

Fig. S1. TGA profile of (a) FPBA, (b) rGO, and (c) FPBA/rGO composite.

Table S2. Comparison of FPBA, rGO, and FPBA/rGO composite weight loss percentage.

| Sample   | Weight loss in %      |                        |                        |
|----------|-----------------------|------------------------|------------------------|
|          | 1                     | 2                      | 3                      |
| FPBA     | 16.23 %<br>(30-280°C) | 7.62 %<br>(280-480°C)  | 17.61 %<br>(480-680°C) |
| rGO      | 91.38 %<br>(30-540°C) | -                      | -                      |
| FPBA-rGO | 14.23 %<br>(30-280°C) | 10.57 %<br>(280-480°C) | 14.71 %<br>(480-680°C) |

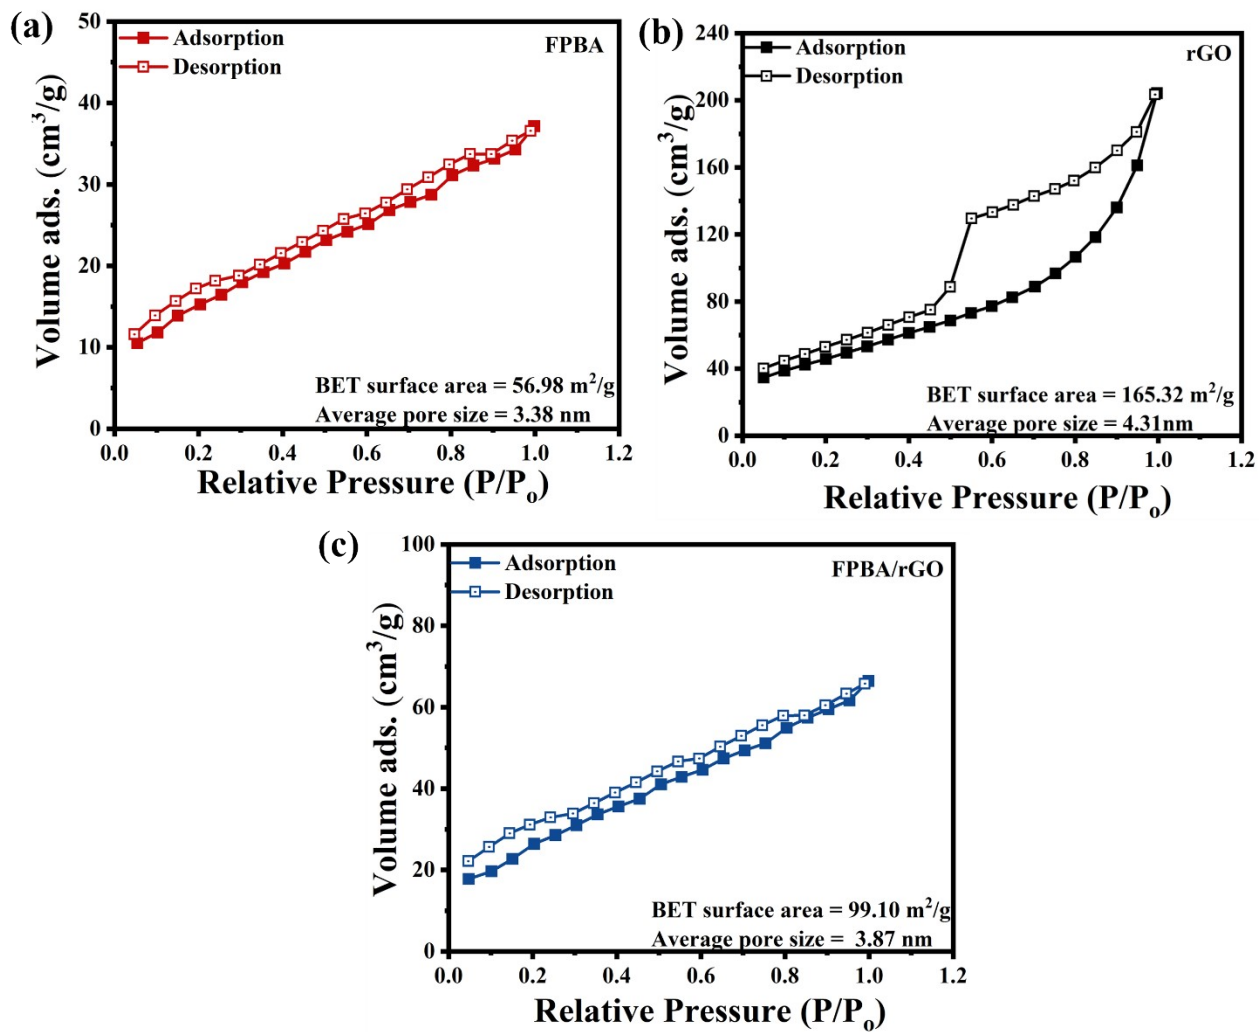

Fig. S2.  $\text{N}_2$  adsorption-desorption isotherm of (a) FPBA (b) rGO, and (c) FPBA/rGO composite.

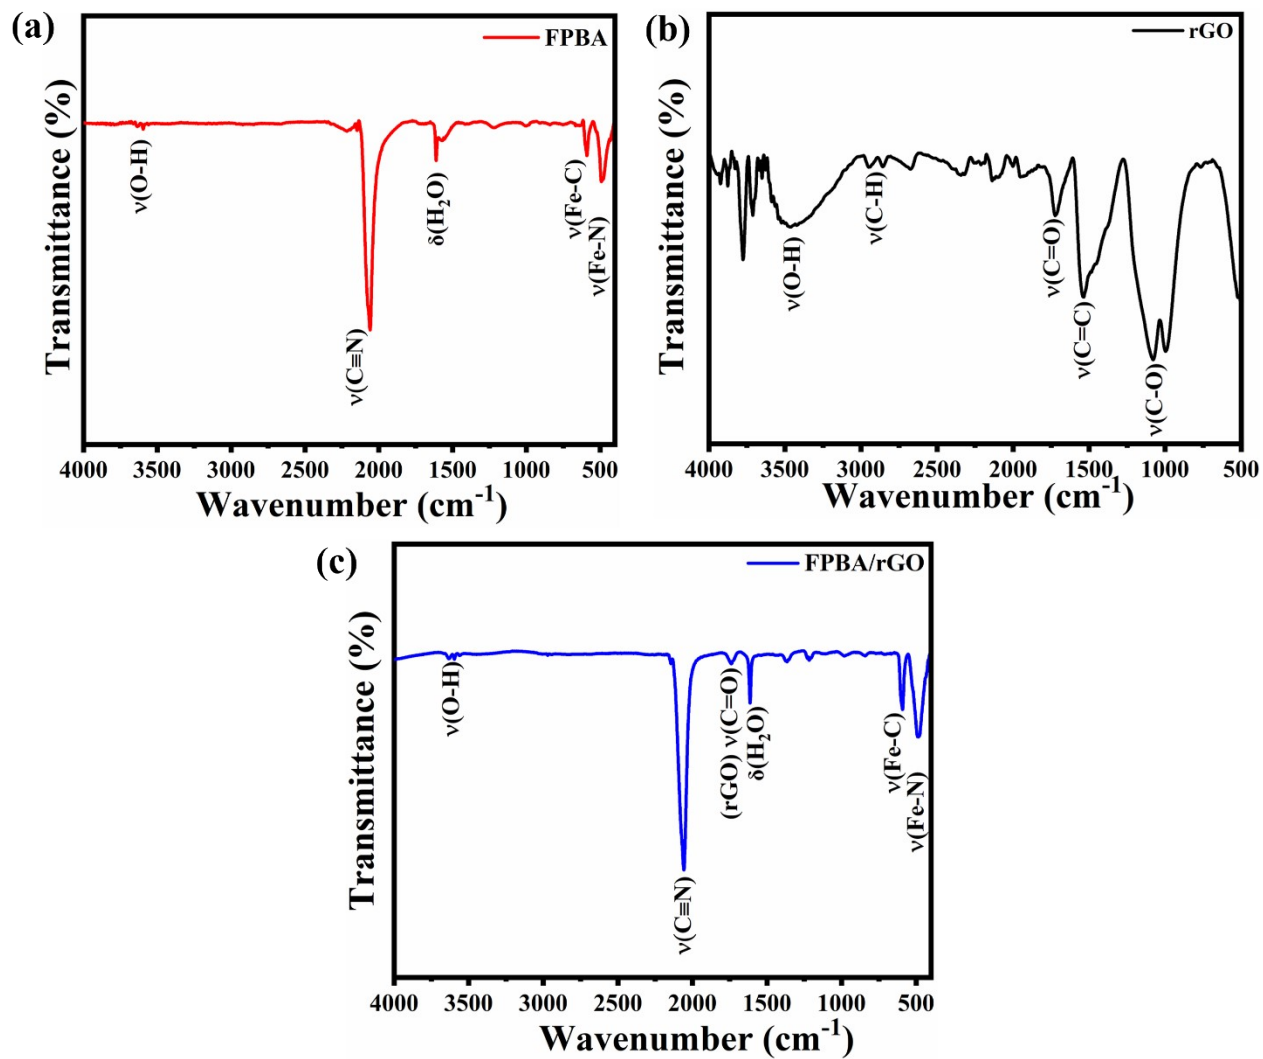

Fig. S3. FTIR spectra of (a) FPBA, (b) rGO, and (c) FPBA/rGO composite.

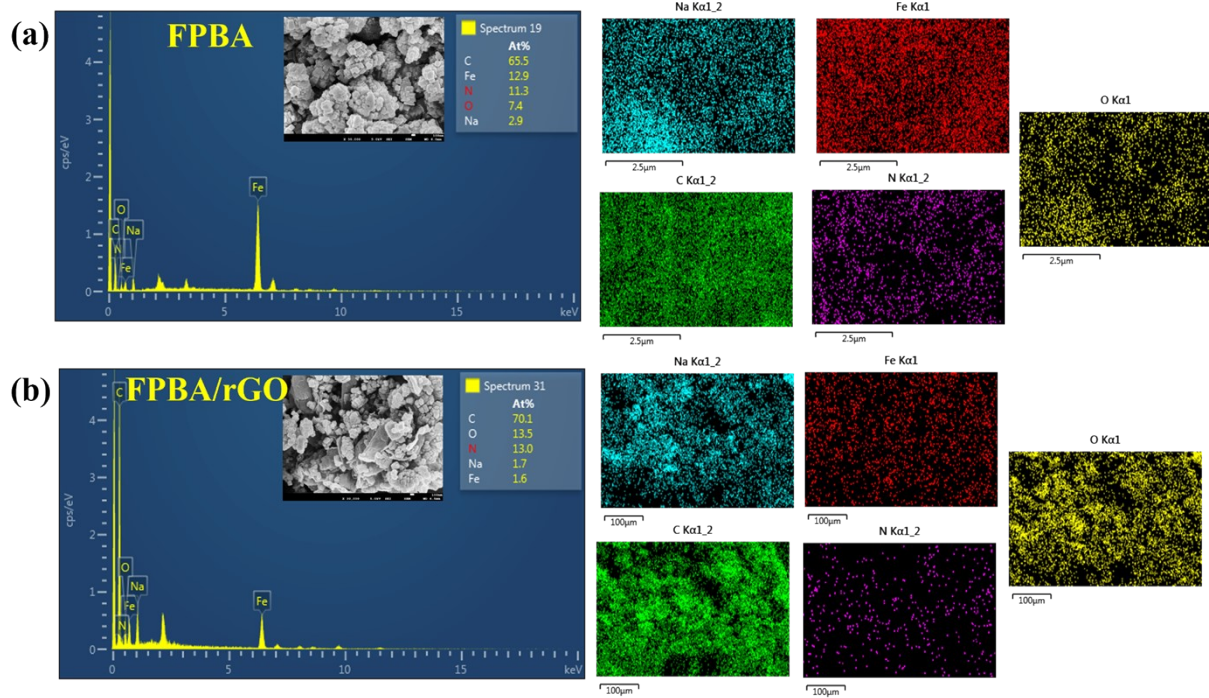

**Fig. S4.** EDX spectra and mapping of Na, Fe, C, N, and O elements in FPBA and FPBA/rGO composite.



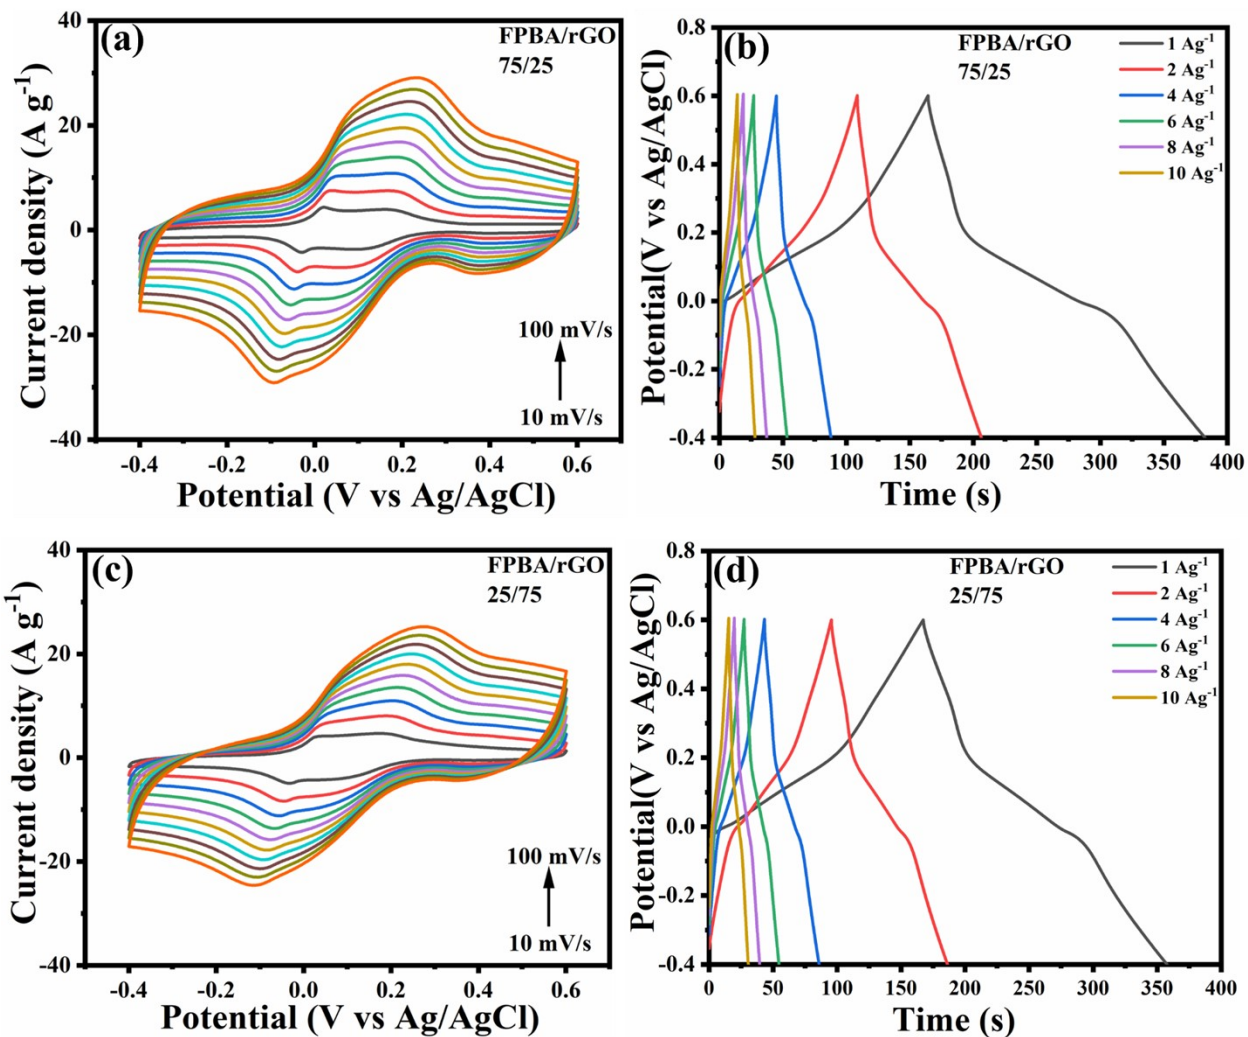

Fig. S5. (a-d) CV and GCD profiles of FPBA/rGO composites with different ratios of FPBA and rGO at varying scan rates and current densities.

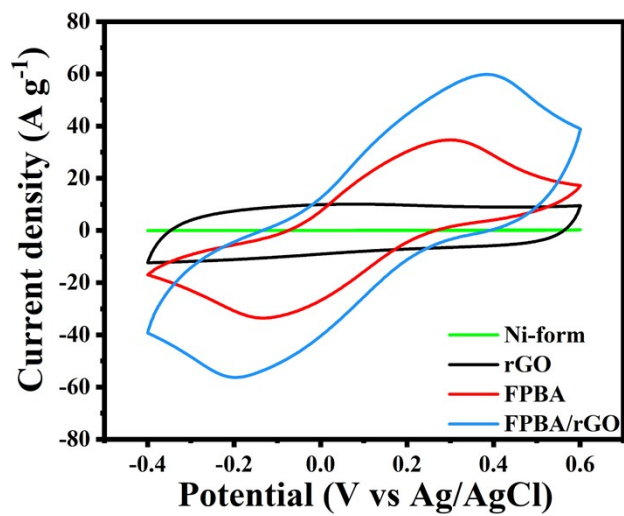

**Fig. S6.** CV profile comparison of bare Ni-form, rGO, FPBA, and FPBA/rGO composite at 100 mV.s<sup>-1</sup> scan rate.

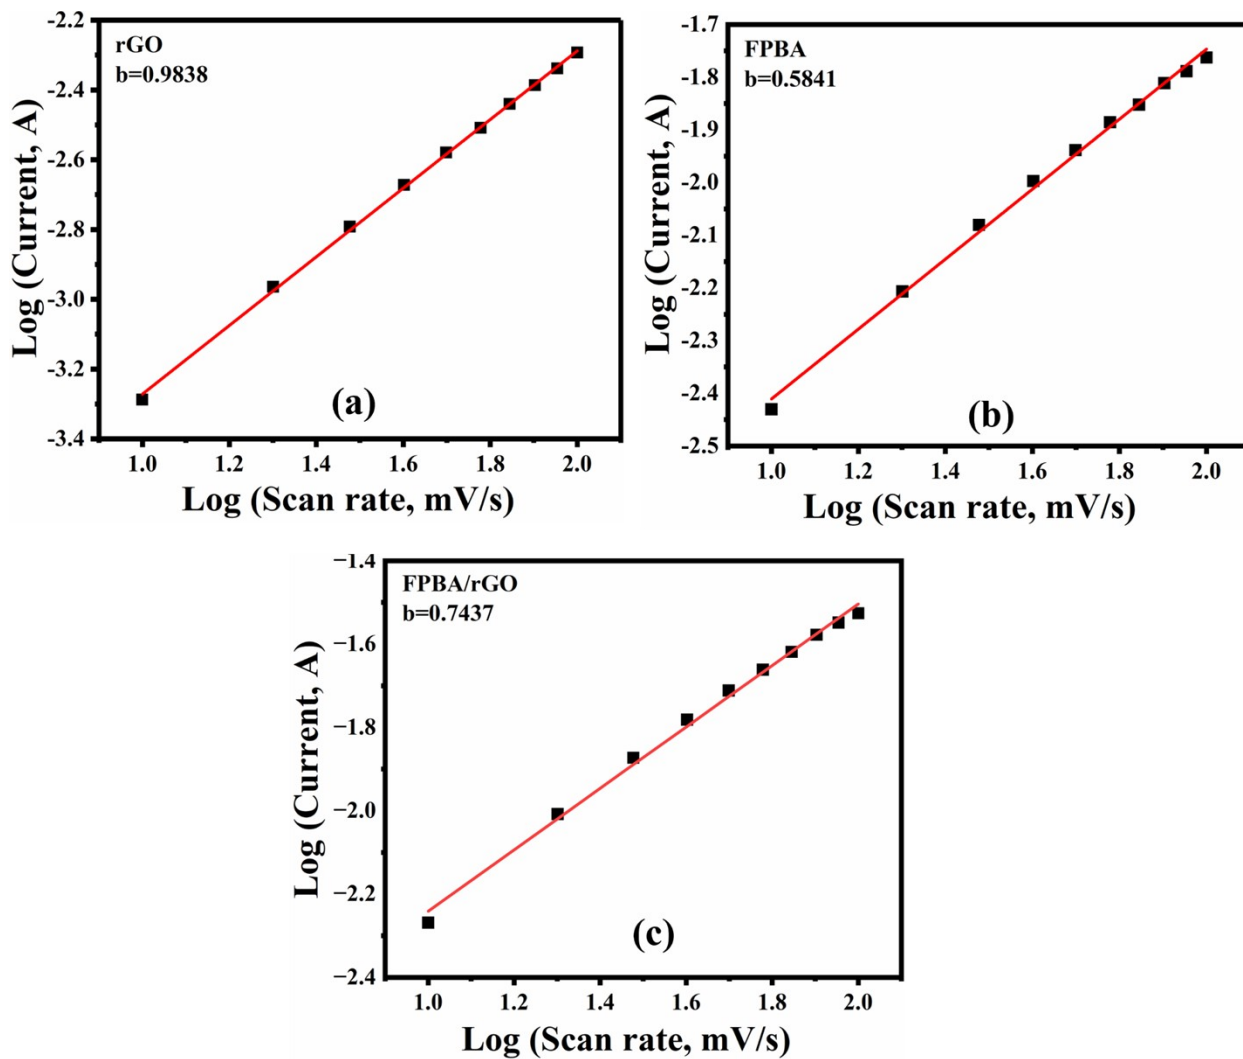

**Fig. S7.** Charge storage kinetics log (highest current, A) vs. log (scan rate,  $\text{mV s}^{-1}$ ) graph plots of (a) rGO, (b) FPBA, and (c) FPBA/rGO composite.

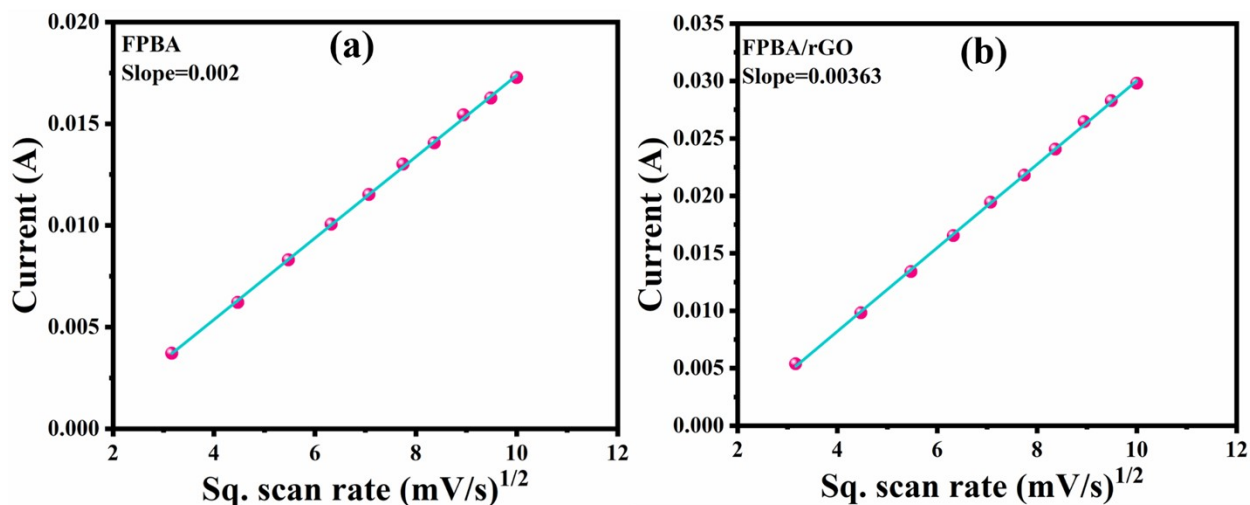

**Fig. S8.** Electrochemical kinetics analysis: Peak current (highest current, A) vs. square root of scan rate (mV s<sup>-1</sup>)<sup>1/2</sup> graph plots of (a) FPBA, and (b) FPBA/rGO composite at different scan rates between 10 to 100 mV s<sup>-1</sup>. It is observed that the peak currents for both electrodes exhibit a linear relationship with the square root of the scan rate.

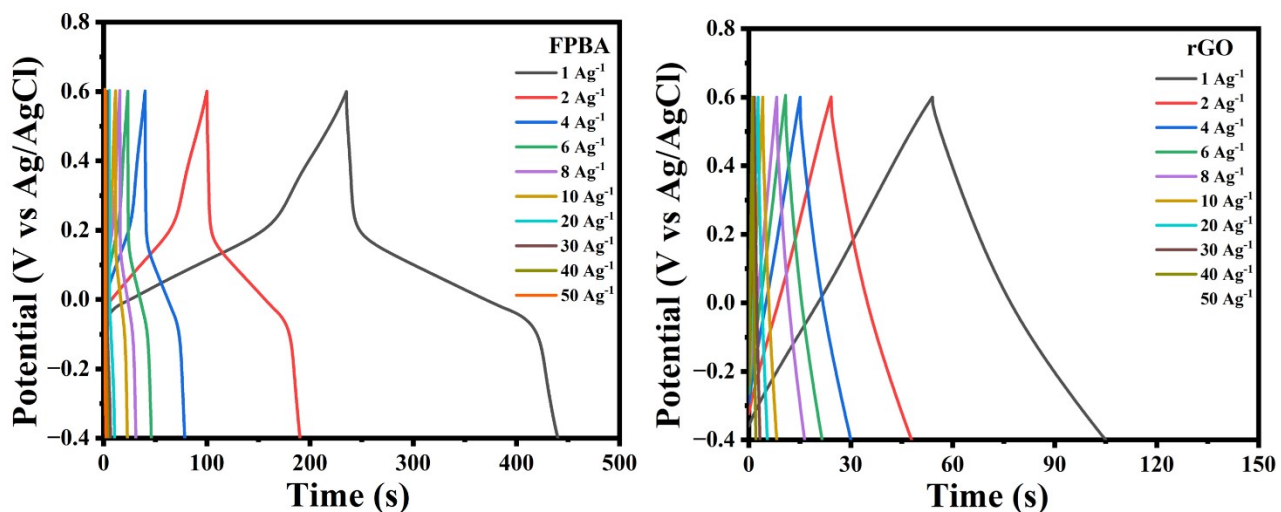

**Fig. S9.** GCD profile comparison of (a) FPBA and (b) rGO at various current densities ranging from 1-50 A g<sup>-1</sup>.

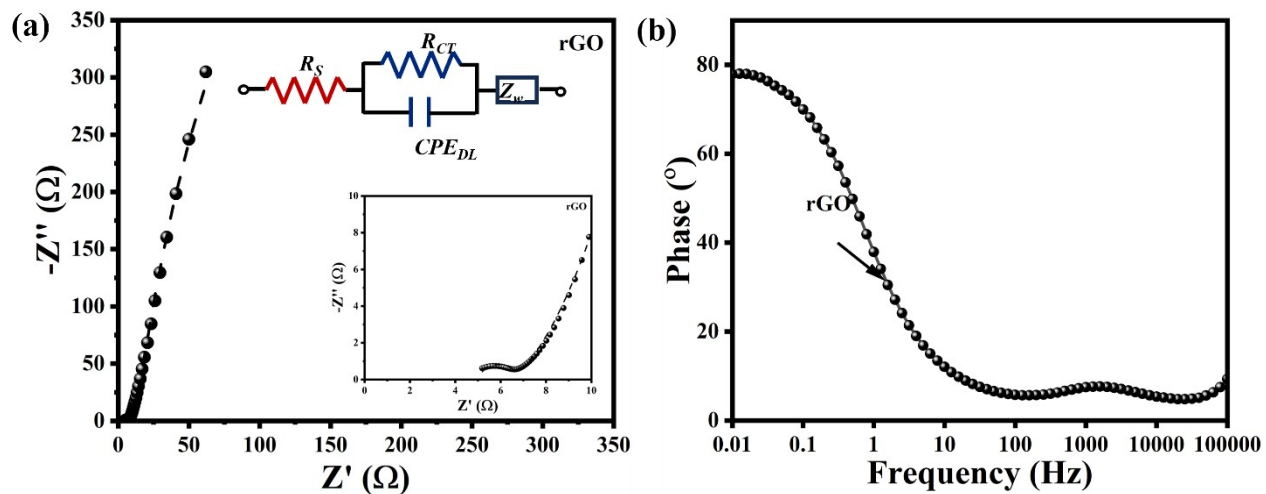

Fig. S10. (a) Nyquist plot and equivalent Randles circuit, (b) Bode phase angle plots of rGO.

Table S3. Calculated resistance and diffusion coefficient from EIS spectra of FPBA, FPBA/rGO composite and rGO.

|          | $R_S$ ( $\Omega$ ) | $R_{CT}$ ( $\Omega$ ) | $\sigma$ ( $\Omega \text{ s}^{-1/2}$ )<br>(from <i>EIS Fitting</i> ) | $\sigma$ ( $\Omega \text{ s}^{-1/2}$ )<br>(from Randles circuit) | $D_{\text{Na}^+}$<br>( $\text{cm}^2 \text{ s}^{-1}$ ) |
|----------|--------------------|-----------------------|----------------------------------------------------------------------|------------------------------------------------------------------|-------------------------------------------------------|
| FPBA     | 4.454              | 3.501                 | 7.602                                                                | 7.013                                                            | $3.881 \times 10^{-11}$                               |
| FPBA/rGO | 4.19               | 2.431                 | 4.180                                                                | 3.936                                                            | $1.283 \times 10^{-10}$                               |
| rGO      | 5.033              | 1.445                 | 39.35                                                                | -                                                                | -                                                     |

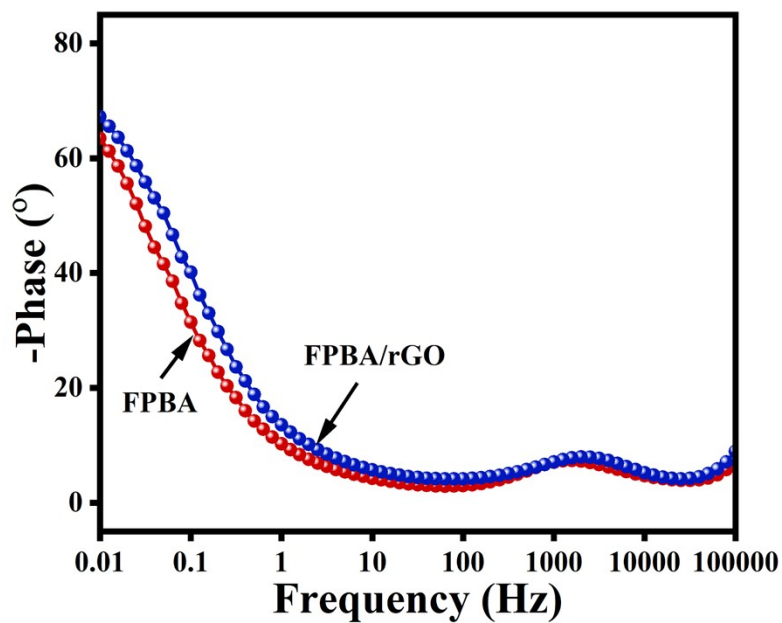

Fig. S11. Bode phase angle plots of FPBA and FPBA/rGO composite

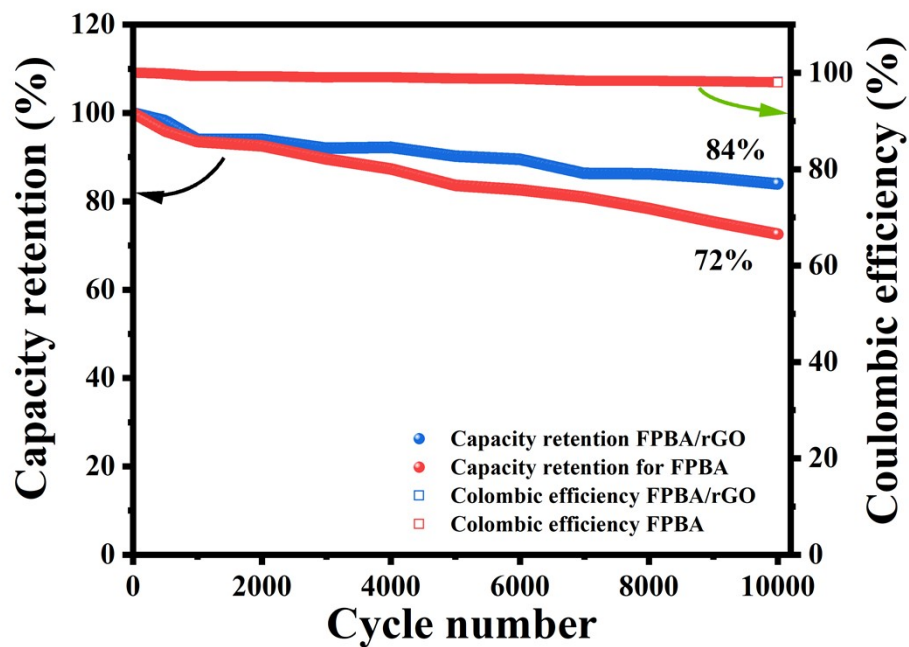

Fig. S12. Cyclic stability of FPBA and FPBA/rGO composite at  $10 \text{ A g}^{-1}$  for 10000 cycles.

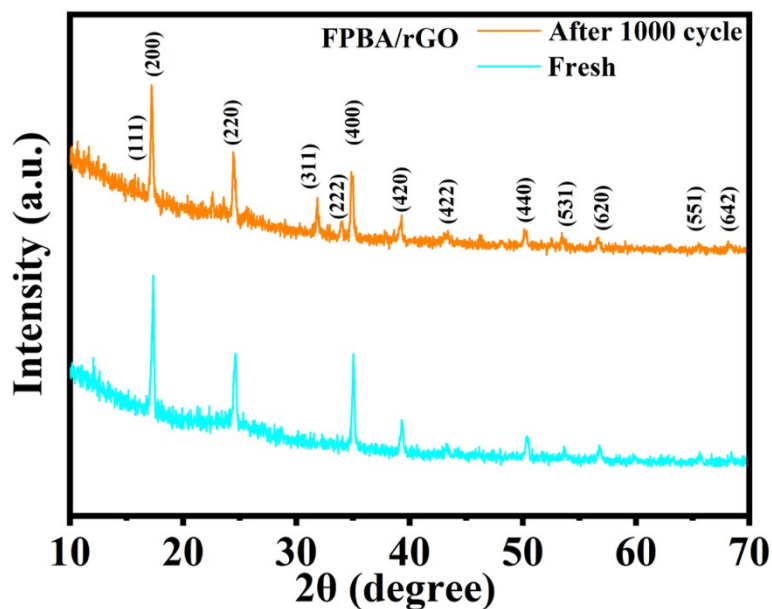

Fig. S13. PXRD data of FPBA/rGO fresh and after 1000 cycles.

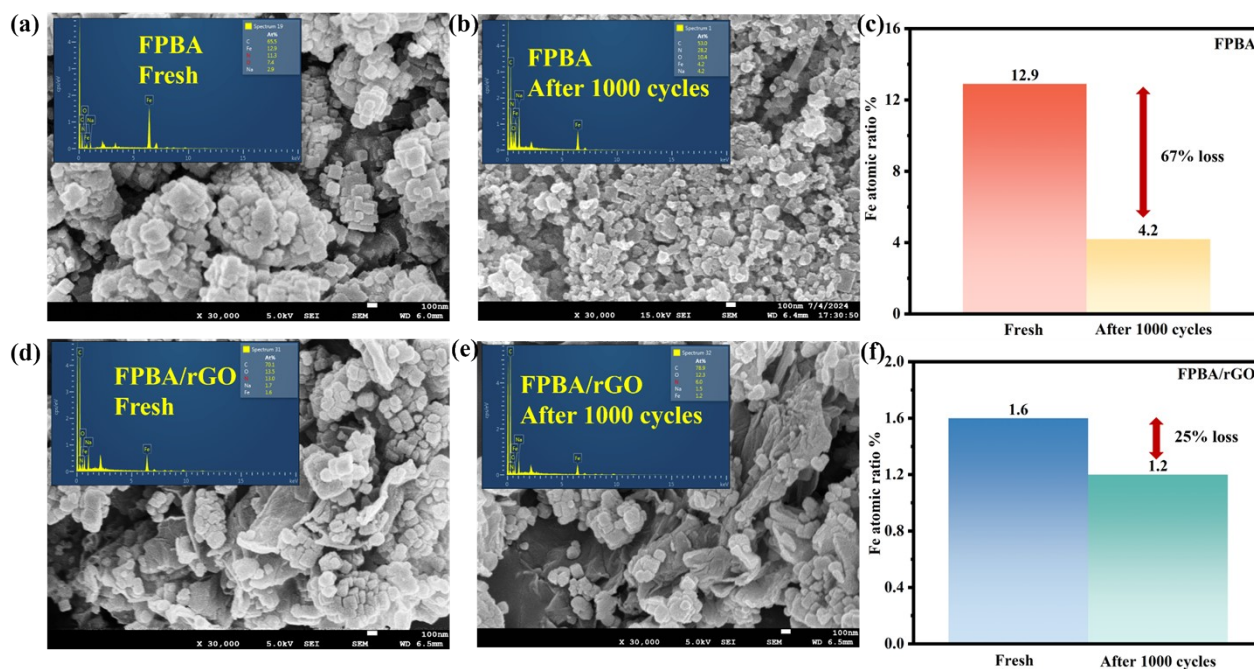

Fig. S14. (a-b) FESEM and EDX spectra of (a) FPBA electrode fresh and (b) FPBA electrode after 1000 cycles; (c) Iron atomic ratio % comparison between fresh and after 1000 cycles FPBA electrode; (d-e) FESEM and EDX spectra of (d) FPBA/rGO composite electrode fresh and (e)

FPBA/rGO composite electrode after 1000 cycles; (f) Iron atomic ratio % comparison between fresh and after 1000 cycles FPBA/rGO composite.

**Table S4.** The concentration of  $[\text{Fe}(\text{CN})_6]^{4-}$  and  $[\text{Fe}(\text{CN})_6]^{3-}$  after 1000 cycles was calculated according to the UV-Vis spectra.

| <b>Concentration</b>                      | <b><math>[\text{Fe}(\text{CN})_6]^{4-}</math><br/>(mM)</b> | <b><math>[\text{Fe}(\text{CN})_6]^{3-}</math><br/>(mM)</b> | <b>Total<br/>(mM)</b> |
|-------------------------------------------|------------------------------------------------------------|------------------------------------------------------------|-----------------------|
| <b>FPBA<br/>after 1000<br/>cycles</b>     | 0.328                                                      | 0.208                                                      | 0.536                 |
| <b>FPBA/rGO<br/>after 1000<br/>cycles</b> | 0.15                                                       | 0.045                                                      | 0.195                 |



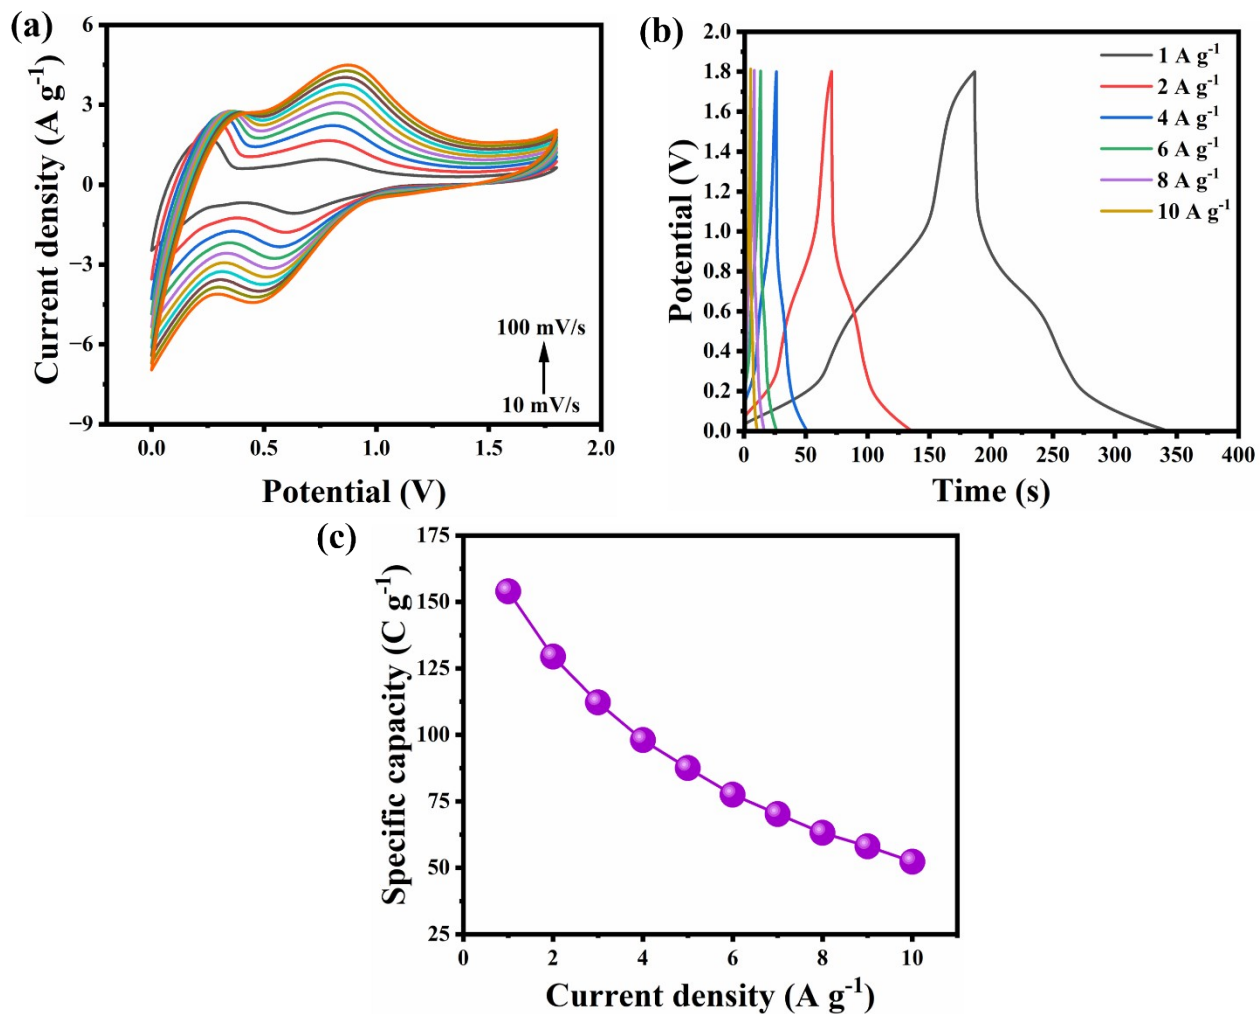

**Fig. S15.** (a) CV profile of the SSsCD at scan rates from 10 mV s<sup>-1</sup> to 100 mV s<sup>-1</sup>; (b) GCD profiles of the SSsCD at current densities from 1 A g<sup>-1</sup> to 10 A g<sup>-1</sup> (c) Specific capacity of SSsCD Vs. current densities (1-10 A g<sup>-1</sup>) plot for FPBA SSsCD.

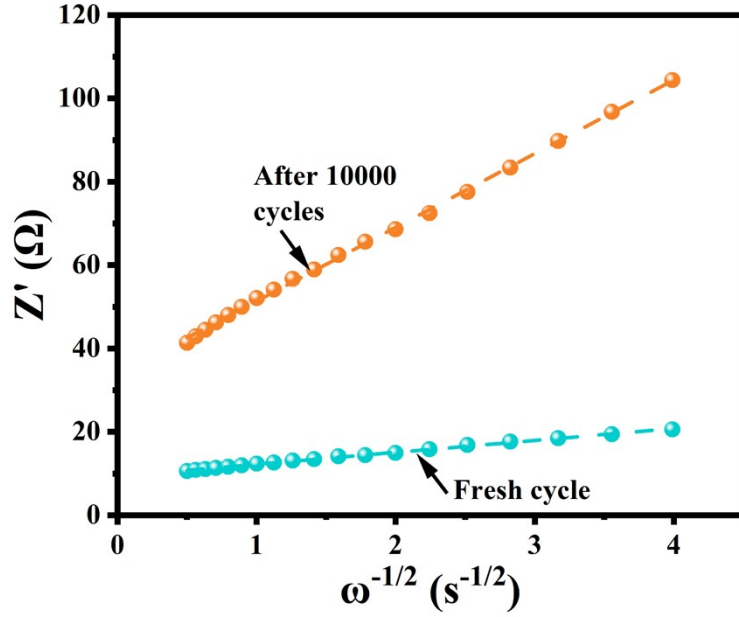

**Fig. S16.** Kinetics calculation based on the frequency ( $\omega^{-1/2}$ ) and  $Z'$  values of fresh and after 10000 cycles of the FPBA/rGO composite SScD.

**Table S5.** Calculated resistance and diffusion coefficient from EIS spectra of fresh and after 10000 cycles of the FPBA/rGO composite SScD.

|                           | $R_S$ ( $\Omega$ ) | $R_{CT}$ ( $\Omega$ ) | $\sigma$ ( $\Omega$ s $^{-1/2}$ ) | $D_{Na^+}$<br>(cm $^2$ s $^{-1}$ ) |
|---------------------------|--------------------|-----------------------|-----------------------------------|------------------------------------|
| <b>Fresh cycle</b>        | 3.034              | 5.901                 | 2.861                             | $2.74 \times 10^{-10}$             |
| <b>After 10000 cycles</b> | 4.041              | 52.61                 | 17.697                            | $7.16 \times 10^{-12}$             |

**Table S6.** Comparison table of FPBA/rGO composite SScD.

| <b>Electrode material</b>       | <b>Operating potential window (V)</b> | <b>Specific capacity (C g<sup>-1</sup>)</b>                                      | <b>Energy density (Wh Kg<sup>-1</sup>)</b> | <b>Power density (W Kg<sup>-1</sup>)</b> | <b>Cyclic retention</b>                                            | <b>Ref.</b> |
|---------------------------------|---------------------------------------|----------------------------------------------------------------------------------|--------------------------------------------|------------------------------------------|--------------------------------------------------------------------|-------------|
| Graphene@prussian blue//AC      | 1.8                                   | 44.61 Fg <sup>-1</sup><br>(80.29 C g <sup>-1</sup> )<br>at 0.5 A g <sup>-1</sup> | 20.1                                       | 450                                      | 87.5% retention<br>at 5 A g <sup>-1</sup><br>over 5000<br>cycles   | 1           |
| Cobalt hexacyanoferrate//AC     | 1.4                                   | 65.5 Fg <sup>-1</sup><br>(91.7 C g <sup>-1</sup> )<br>at 0.5 A g <sup>-1</sup>   | 17.4                                       | 1196                                     | 91 retentions<br>at 1 A g <sup>-1</sup><br>over 6000<br>cycles     | 2           |
| Co-Co@Ni-Fe PBA-PPy//AC         | 1.6                                   | 64 Fg <sup>-1</sup><br>(102.4 C g <sup>-1</sup> )<br>at 1 A g <sup>-1</sup>      | 20                                         | 808.9                                    | 79% retention<br>at 10 A g <sup>-1</sup><br>over 2000<br>cycles    | 3           |
| CoHCF/rGO                       | 2.0                                   | 65 Fg <sup>-1</sup><br>(130 C g <sup>-1</sup> )<br>at 1 A g <sup>-1</sup>        | 39.6                                       | 1000                                     | 91% retention<br>at 5 A g <sup>-1</sup><br>Over 1000<br>cycles     | 4           |
| Ni <sub>2</sub> CoHCF/NF//AC/NF | 1.5                                   | 96.9 Fg <sup>-1</sup><br>(145.4 C g <sup>-1</sup> )<br>at 0.5 A g <sup>-1</sup>  | 30.59                                      | 378.7                                    | 94.32 retention<br>at 2 A g <sup>-1</sup><br>over 2000<br>cycles   | 5           |
| CoHCF//AC                       | 2                                     | 78 Fg <sup>-1</sup><br>(156 C g <sup>-1</sup> )<br>at 1 A g <sup>-1</sup>        | 42.5                                       | 990                                      | 89% retention<br>at 5 A g <sup>-1</sup><br>over 5000<br>cycles     | 6           |
| NiFePBA/rGO/CC-0.5              | 2                                     | 92 Fg <sup>-1</sup><br>(184 C g <sup>-1</sup> )<br>at 0.5 A g <sup>-1</sup>      | 51.11                                      | 540                                      | 74.38% retention<br>at 5 A g <sup>-1</sup><br>over 10000<br>cycles | 7           |

|          |     |                                                                                |       |     |                                                                    |                      |
|----------|-----|--------------------------------------------------------------------------------|-------|-----|--------------------------------------------------------------------|----------------------|
| FPBA/rGO | 1.8 | 138.5 Fg <sup>-1</sup><br>(249.3 C g <sup>-1</sup> )<br>at 1 A g <sup>-1</sup> | 62.32 | 900 | 90.5% retention<br>at 10 A g <sup>-1</sup><br>over 10000<br>cycles | <b>This<br/>work</b> |
|----------|-----|--------------------------------------------------------------------------------|-------|-----|--------------------------------------------------------------------|----------------------|

---

### References:

- 1 S.-C. Wang, M. Gu, L. Pan, J. Xu, L. Han and F.-Y. Yi, *Dalton Trans.*, 2018, **47**, 13126–13134.
- 2 Z. Song, W. Liu, Q. Yuan, Q. Zhou, G. Liu and Z. Zhao, *J. Mater. Sci. Mater. Electron.*, 2018, **29**, 14897–14905.
- 3 P. Mukherjee, V. R. S, A. Borenstein and T. Zidki, *Mater. Chem. Front.*, 2023, **7**, 1110–1119.
- 4 J.-G. Wang, Z. Zhang, X. Liu and B. Wei, *Electrochimica Acta*, 2017, **235**, 114–121.
- 5 X. Zhu, H. Tao and M. Li, *Int. J. Hydrog. Energy*, 2020, **45**, 14452–14460.
- 6 J.-G. Wang, Z. Zhang, X. Zhang, X. Yin, X. Li, X. Liu, F. Kang and B. Wei, *Nano Energy*, 2017, **39**, 647–653.
- 7 T. Miao, J. Zhang, Y. Wang, K. Fang, Z. Wang, K. Zhan and B. Zhao, *J. Colloid Interface Sci.*, 2023, **648**, 768–777.
